# Supplementary material
Source: Springer Nature journal article supplement (https://www.springermedizin.de/resource/supplementary/13063_2008_271_MOESM2_ESM.pdf/9622444)

**Cummulative  
Z-Score**

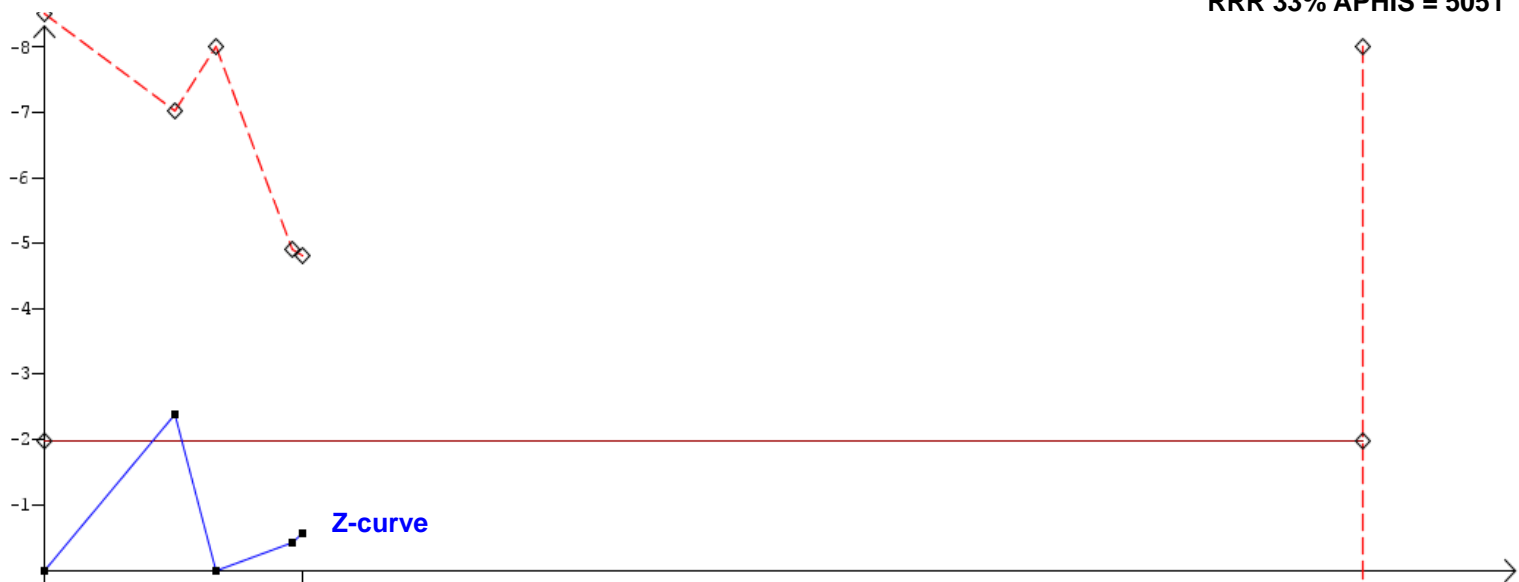

**989**

**Z-curve**

**Number of patients  
linear scaled**

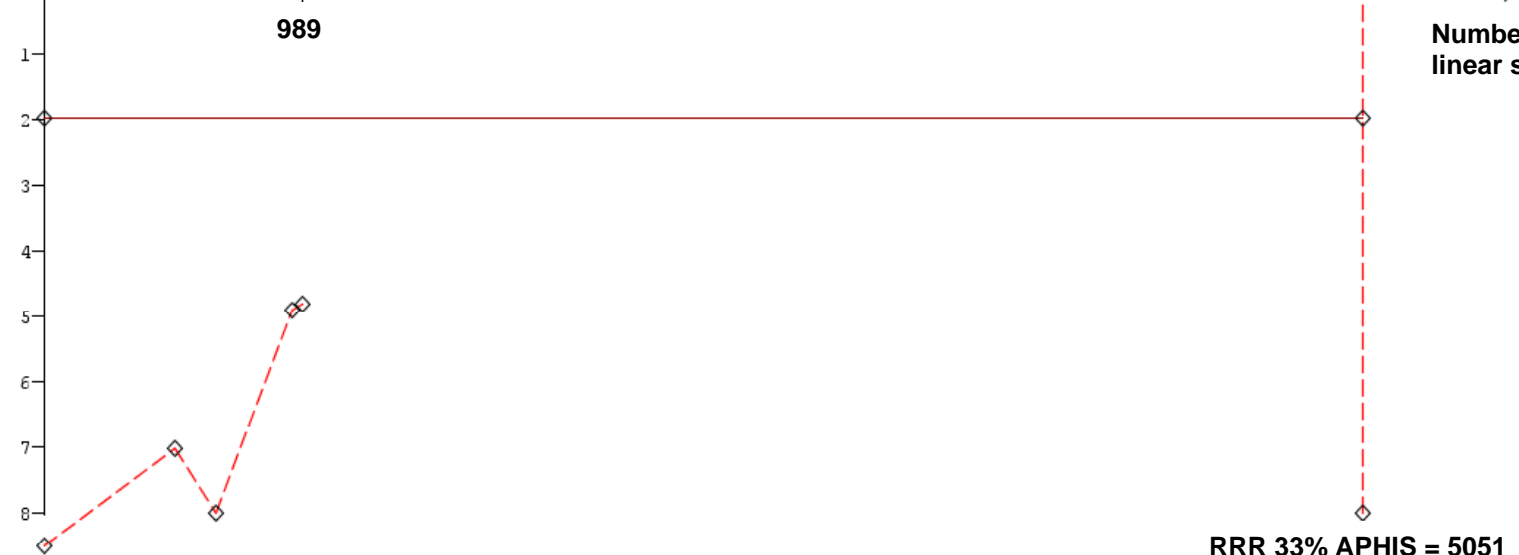

**RRR 33% APHIS = 5051**

**RRR 33% APHIS = 5051**

Supplement: MOESM2 [file 9622444]
